# Supplementary material
Source: PubMed Central journal article supplement (PMC4799903)
Supplement: HESR-51-746-s002.pdf [file HESR-51-746-s002.pdf]

## Appendix A: PRISMA Chart

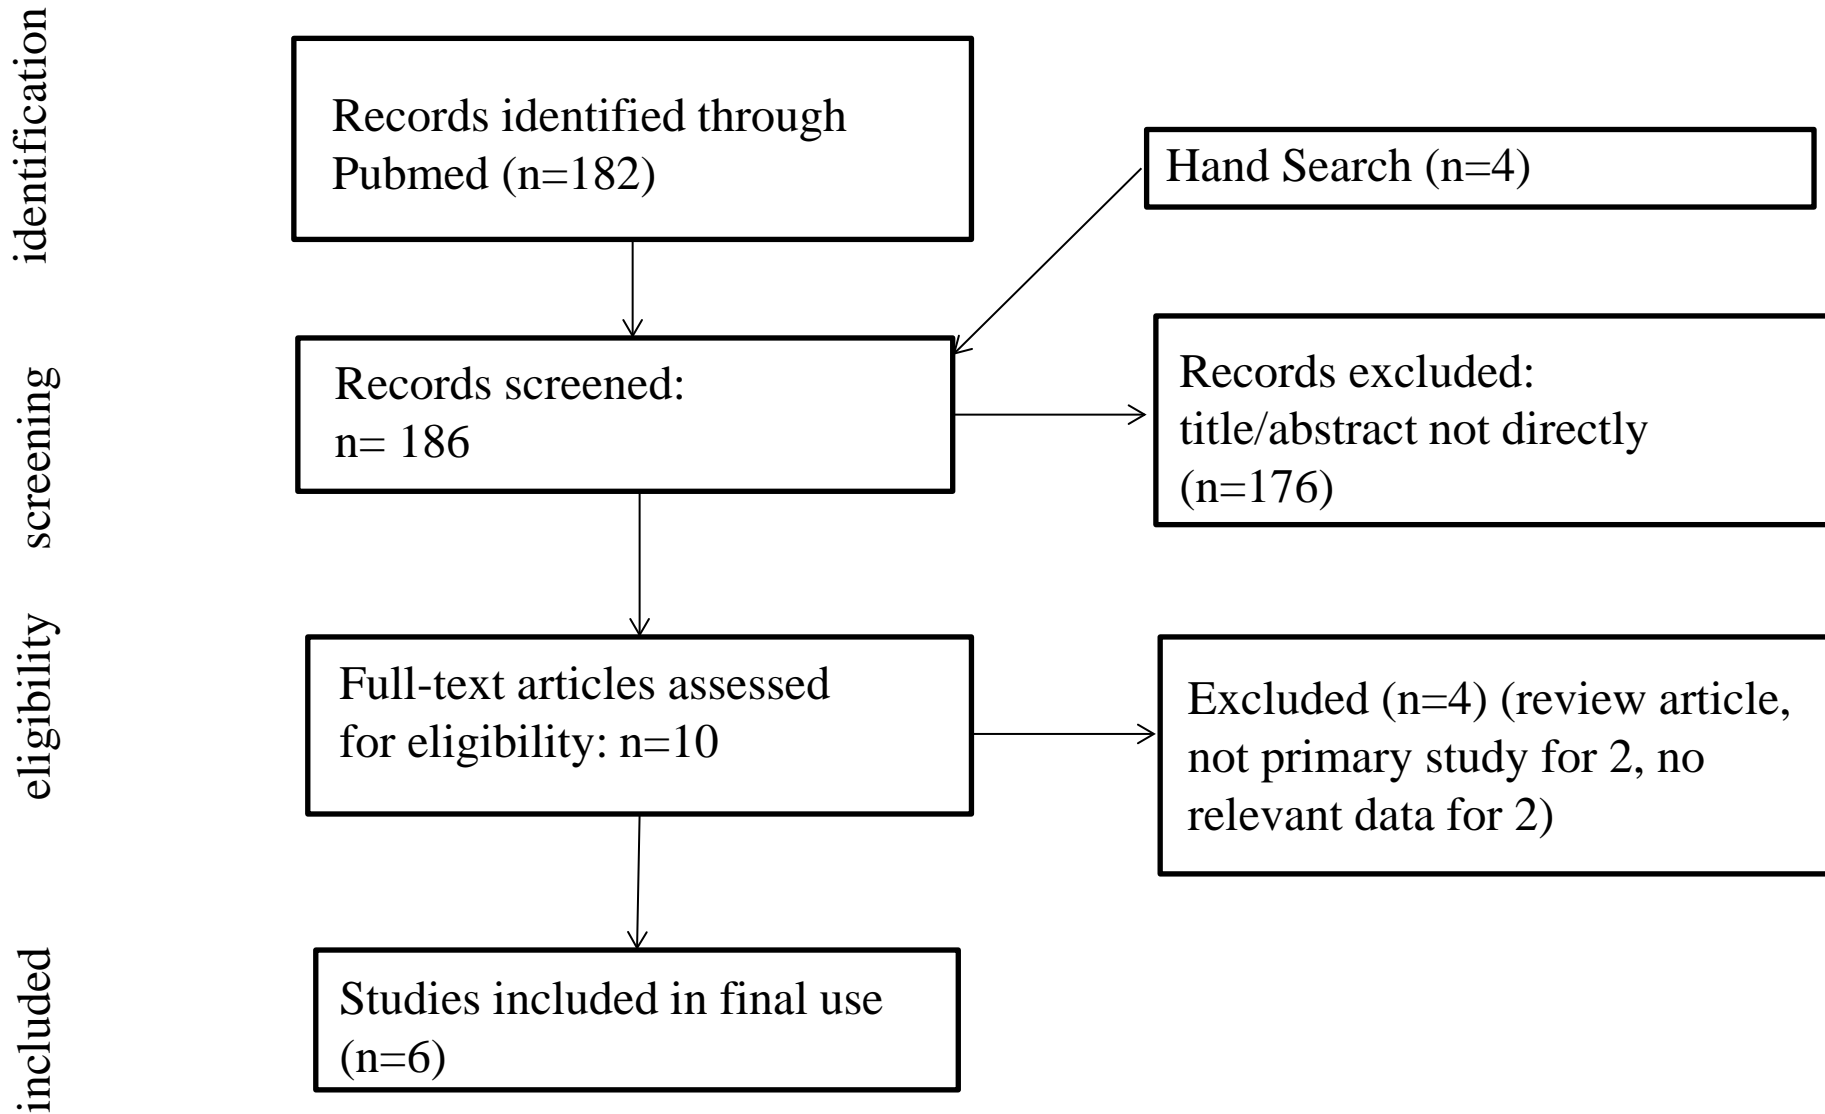

NOTE: PRISMA=Preferred Reporting Items for Systematic Reviews and Meta-analysis
